# Supplementary material
Source: Springer Nature journal article supplement (https://www.springermedizin.de/resource/supplementary/12943_2010_904_MOESM7_ESM.pdf/9551960)

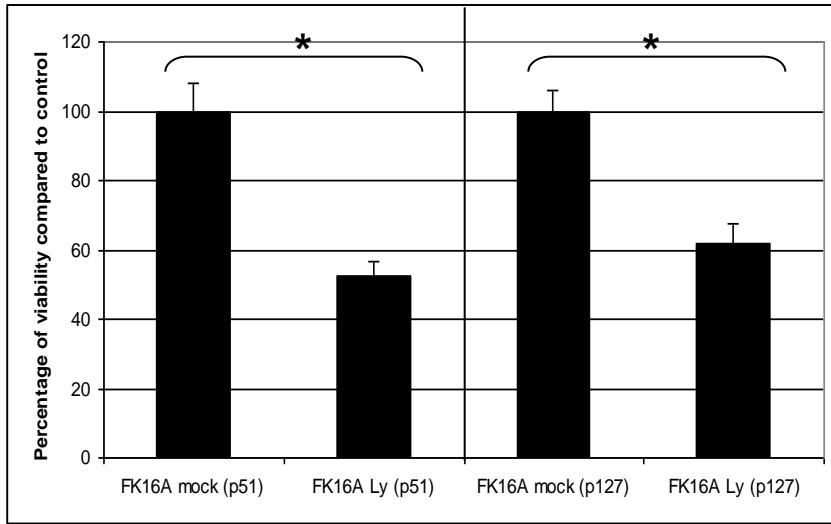

A

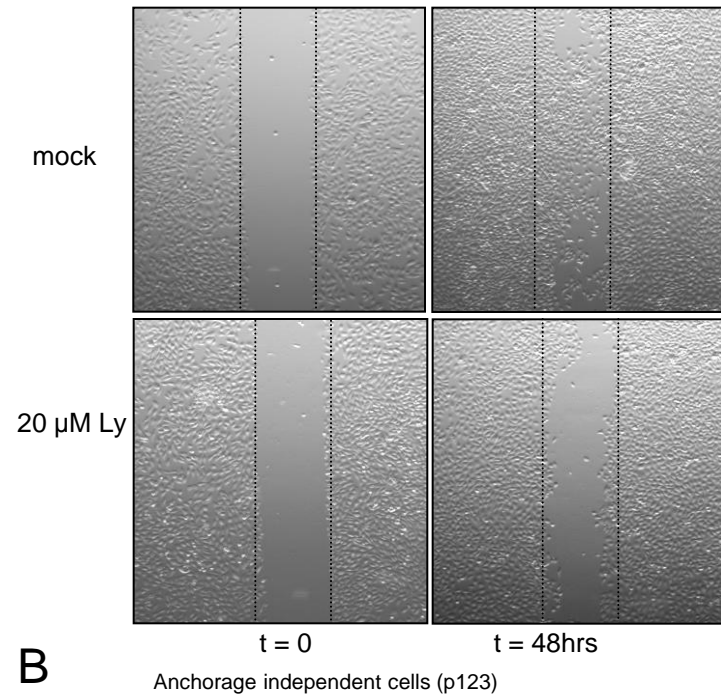

B

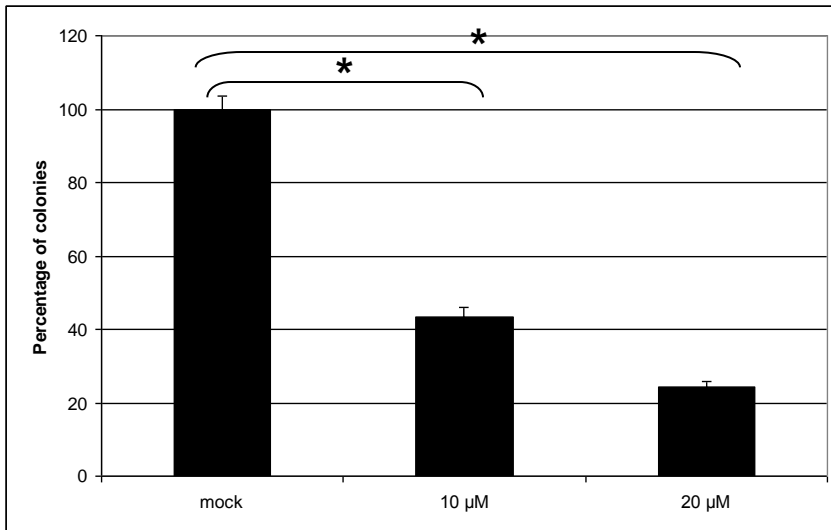

C

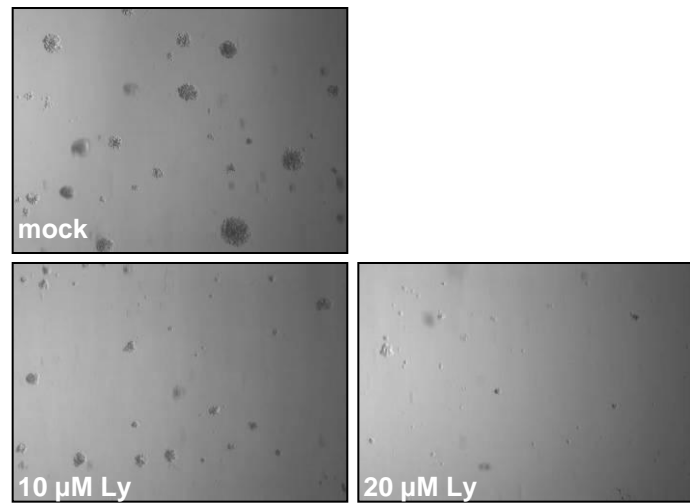

D

Anchorage independent cells (p119)

Anchorage independent cells (p119)

Supplement: MOESM7 [file 9551960]
